# Supplementary material for: V2C/VO2 nanoribbon intertwined nanosheet dual heterostructure for highly flexible and robust lithium–sulfur batteries
Source: Royal Society of Chemistry journal article supplement (doi:10.1039/d1ta05693j), 2021-01-01
Supplement: d1ta05693j1.pdf [file d1ta05693j1.pdf]

**Electronic Supplementary Information (ESI) for:**  
**V<sub>2</sub>C/VO<sub>2</sub> Nanoribbon Intertwined Nanosheet Congenetic**  
**Dual-Heterostructure for Highly Flexible and Robust**  
**Lithium-Sulfur Batteries**

Mengyao Xu, Tianli Wu, Jing Qi, Dan Zhou and Zhubing Xiao\*

Henan Key Laboratory of Photovoltaic Materials, Henan University, Kaifeng, 475004,  
China.

\*Corresponding author

Email: [zbxiao@vip.henu.edu.cn](mailto:zbxiao@vip.henu.edu.cn)

## **Experimental section**

### **Polysulfide adsorption test**

The  $\text{Li}_2\text{S}_4$  solution was prepared by chemical reaction between sublimed sulfur and  $\text{Li}_2\text{S}$  with a molar ratio of 3:1 in DME solution in an argon-filled glovebox, the solution was stirred at room temperature for 24 h to form a  $4 \text{ mmol L}^{-1}$   $\text{Li}_2\text{S}_4$  stock solution.  $\text{V}_2\text{C}$ ,  $\text{V}_2\text{C-140}$ ,  $\text{V}_2\text{C-160}$  and  $\text{V}_2\text{C-180}$  were added separately to 10 mL of  $\text{Li}_2\text{S}_4$  solution, followed by mild magnetic stirring for 2 h. The adsorption ability was visually detected by color change of the resultant solution.

### **Electrochemical measurements**

Freestanding sulfur cathode pieces with a diameter of 14 mm were punched out from as-prepared  $\text{V}_2\text{C-160/S}$  or  $\text{V}_2\text{C/S}$ ,  $\text{V}_2\text{C-140/S}$ ,  $\text{V}_2\text{C-180/S}$  film. The CR2032-type coin-like cells were assembled using self-supporting cathode piece as cathode and lithium foil as anode in Ar-filled glove box. The electrolyte was 1 M Li bis(trifluoromethanesulfonyl) (1,3-dioxolane/1,2-dimethoxyethane, DOL/DME =1:1, v/v) containing 2%  $\text{LiNO}_3$  and Celgard 2400 film was used as the separator. Galvanostatic charge/discharge measurement was conducted using Land CT2001A battery test system in the voltage window 1.6-2.8 V. Cyclic voltammetry (CV) and electrochemical impedance spectra (EIS) were tested on CHI604E electrochemical workstation. CV was carried out at a scanning rate of  $0.1 \text{ mV s}^{-1}$  within a voltage window of 1.6-2.8 V and EIS was measured in the frequency range of 100 kHz-0.01 Hz.

### ***Ex situ* XRD measurements**

Self-supporting electrode materials ( $V_2C-160/S$ ) were firstly activated at 0.2 C for three cycles. Then, the cycled electrodes were extracted from coin cell in Ar-filled glove box and thoroughly washed by DOL/DME mixture, followed by drying in Ar-filled glove box. The cycled electrodes at different charge/discharge state were sealed before the XRD measurement.

### **Symmetrical cell assembly and measurements**

The electrodes of symmetrical cells were prepared without loading elemental sulfur. The punched flexible electrode disks (14.0 mm) were used as working and counter electrodes. Electrolyte containing 0.4 M  $Li_2S_6$  and 1 M LiTFSI was dissolved in DME, and the same electrolyte was used without  $Li_2S_6$  as the control. The CV measurements of symmetrical cells were performed in the voltage window from -1 to 1 V at a scanning rate of  $1\text{ mVs}^{-1}$ .

### **Galvanostatic intermittent titrations (GITT) measurements**

Galvanostatic intermittent titrations (GITT) were carried out on a Land CT3001A battery testing system at  $25\text{ }^\circ\text{C}$  in the potential window of 1.6-2.8 V. In addition, the cell was charged/discharged at 0.2 C for a constant time of 30 min, followed by a 10 h rest period.

### **Assembly of flexible Li-S batteries**

The Li-S pouch cells were assembled in a glove box by using same cathode materials, electrolyte and separator with coin cells. The dimension of the  $V_2C-160@S$  electrode and Li ribbon were cut into  $3\text{ cm} \times 2\text{ cm}$ . The cells were sealed with an aluminum-plastic film. An aluminum tab was connected to the  $V_2C-160@S$  electrode, and a

nickel tab was connected to the Li ribbon. The E/S ratio was decreased to 4.5  $\mu\text{L mg}^{-1}$  in order to prevent the electrolyte being squeezed out during the folding processes. The cells were rested for 6 h before the electrochemical examinations. The whole electrochemical-examination conditions are the same as that of the coin cells.

## Computational method

First-principles calculations were performed using the Vienna *ab initio* simulation package known as the VASP code.<sup>[1]</sup> The electronic-ion interaction was described by a projector augmented wave method (PAW).<sup>[2]</sup> The energy cutoff of the plane waves was set to 450 eV. The electron exchange-correlation function was treated using a generalized gradient approximation (GGA) in the form proposed by Perdew, Burke, and Ernzerhof (PBE).<sup>[3]</sup> Particularly, we used the vdW-DF2 functional to include the physical van der Waals (vdW) interaction in the simulation.<sup>[4,5]</sup> The Brillouin zone integration was sampled by with  $3 \times 3 \times 1$  k-grid mesh for geometry optimization, and  $4 \times 4 \times 1$  k-grid mesh for electronic properties calculations to achieve high accuracy. For the bulk VSe<sub>2</sub>, both of atomic positions and lattice vectors were fully optimized using the conjugate gradient algorithm until the maximum atomic forces were less than 0.01 eV/Å with an energy precision of  $10^{-5}$  eV.

The binding energies ( $E_b$ ) of Li<sub>2</sub>S<sub>4</sub> on the substrates are defined as:

$$E_b = (E_{\text{Li}_2\text{S}_4} + E_{\text{Surf}} - E_{\text{Total}})$$

where  $E_{\text{Total}}$  and  $E_{\text{Surf}}$  are the total energies of V<sub>2</sub>C adsorbed with and without Li<sub>2</sub>S<sub>4</sub>, and  $E_{\text{Li}_2\text{S}_4}$  is the total energy of the Li<sub>2</sub>S<sub>4</sub>.

Electron localization function (ELF) is defined as:<sup>[6,7]</sup>

$$\text{ELF} = 1/(1 + (D/D_h)), \text{ where } D = \frac{1}{2} \sum_i |\nabla \varphi_i|^2 - \frac{1}{8} \frac{|\nabla \rho|^2}{\rho} \text{ and } D_h = \frac{3}{10} (3\pi^2 \rho)^{5/3}$$

$\varphi_i$  represents the Kohn Sham orbitals and  $\rho = \sum_i |\varphi_i|^2$  stands for electron charge density. According to the equation, the value of ELF varies from 0 to 1, in which ELF = 1 corresponds to perfect localization of electrons and ELF = 0.5 indicates a uniform electron gas.

### **Structure characterization**

XRD patterns were recorded in the range of  $2\theta = 5-70^\circ$  on a desktop X-ray diffractometer (DX2700) with Cu  $K\alpha$  radiation ( $\lambda = 1.5406 \text{ \AA}$ ). XPS measurements were performed on a AXIS ULTRA spectrometer (Kratos), using nonmonochromatic Al  $K\alpha$  X-ray as the excitation source and choosing C 1s (284.5 eV) as the reference line. TGA was measured at a heating rate of  $10 \text{ }^\circ\text{C min}^{-1}$  using a TAQ600 thermogravimetric analyzer. Nitrogen adsorption/desorption data were recorded at liquid nitrogen temperature (77 K) using a Besorp-Max II (Microtrac BEL) apparatus. Total pore volumes were calculated from the amount adsorbed at a relative pressure ( $P/P_0$ ) of 0.99. The specific surface area was calculated using the Brunauer-Emmett-Teller (BET) equation. SEM images were obtained with a JSM-7001F field-emission scan electron microscope. TEM images were obtained on JEM-2100. UV-vis spectroscopy was performed on a Lambda900 spectrophotometer.

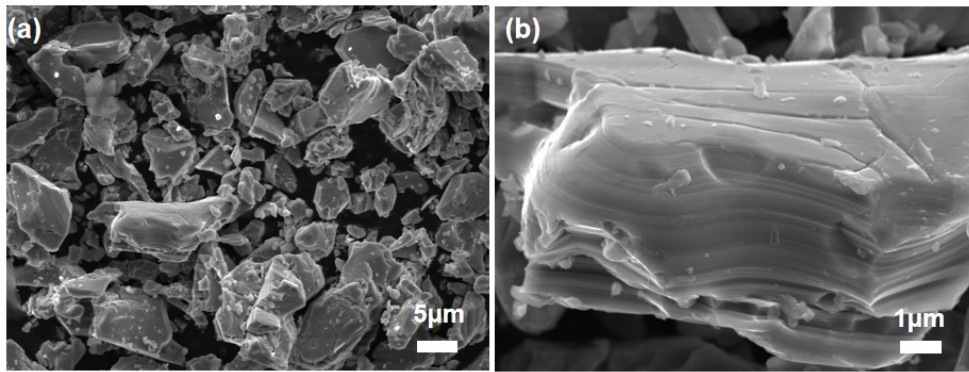

**Fig. S1** SEM images of  $V_2AlC$ .

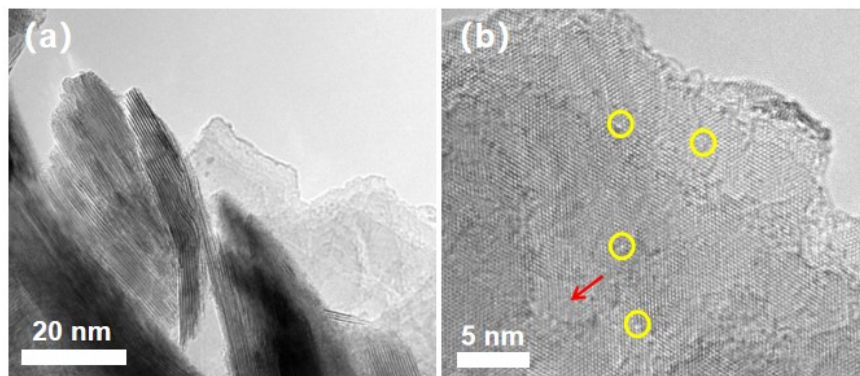

**Fig. S2** TEM images of multi-layered  $V_2C$ . The red arrows and yellow circles indicate the pore defects.

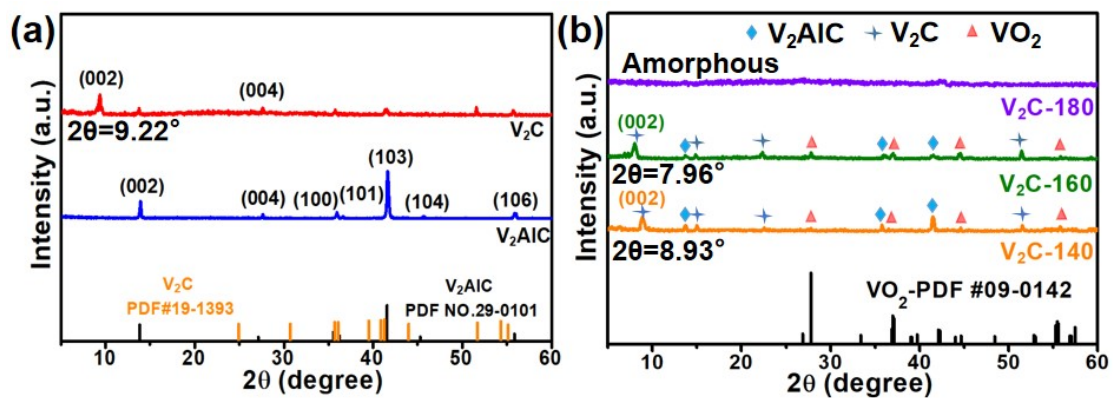

**Fig. S3** XRD patterns of (a) commercial  $V_2AlC$ , etched  $V_2C$ , and (b) hydrothermal-treated  $V_2C$  at various temperatures.

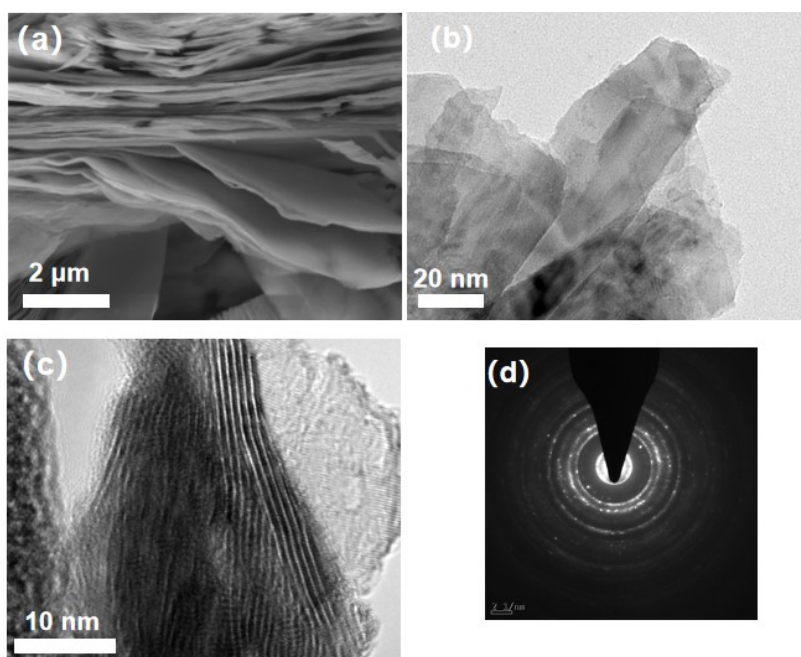

**Fig. S4** (a) SEM, (b, c) TEM images and (d) corresponding SAED pattern of the  $V_2C$ -160 with hydrothermal treatment for 4 h.

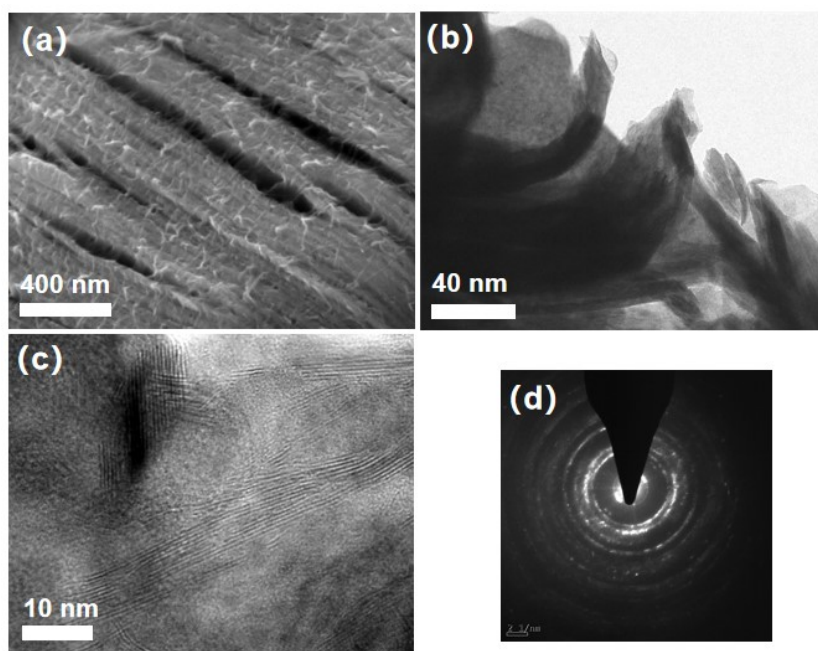

**Fig. S5** (a) SEM, (b, c) TEM images and (d) corresponding SAED pattern of the  $V_2C$ -160 with hydrothermal treatment for 8 h.

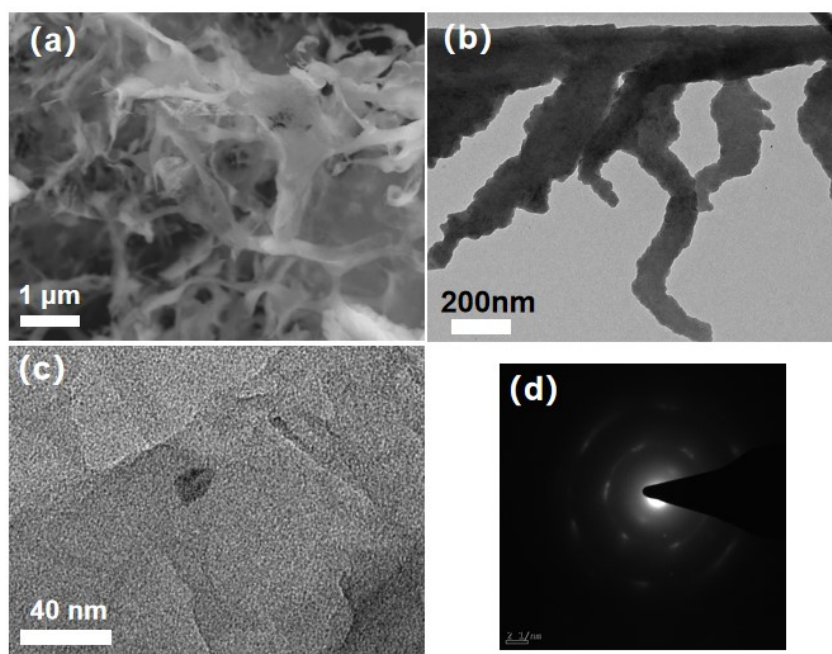

**Fig. S6** (a) SEM, (b, c) TEM images and (d) corresponding SAED pattern of the  $V_2C$ -160 with hydrothermal treatment for 16 h.



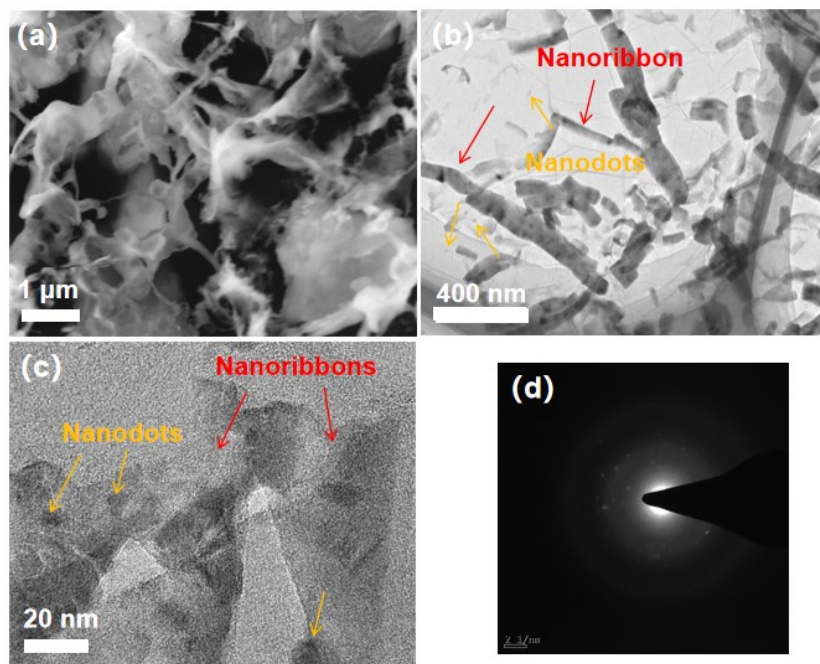

**Fig. S7** (a) SEM, (b, c) TEM images and (d) corresponding SAED pattern of the V<sub>2</sub>C-160 with hydrothermal treatment for 24 h.

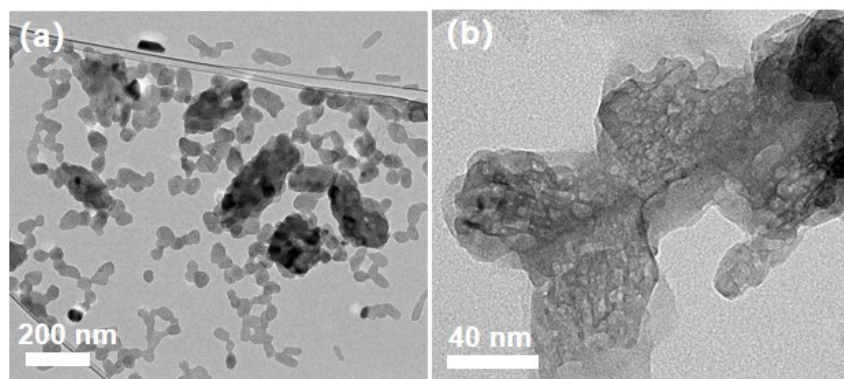

**Fig. S8** (a) SEM, (b, c) TEM images and (d) corresponding SAED pattern of the V<sub>2</sub>C-160 with hydrothermal treatment for 30 h.

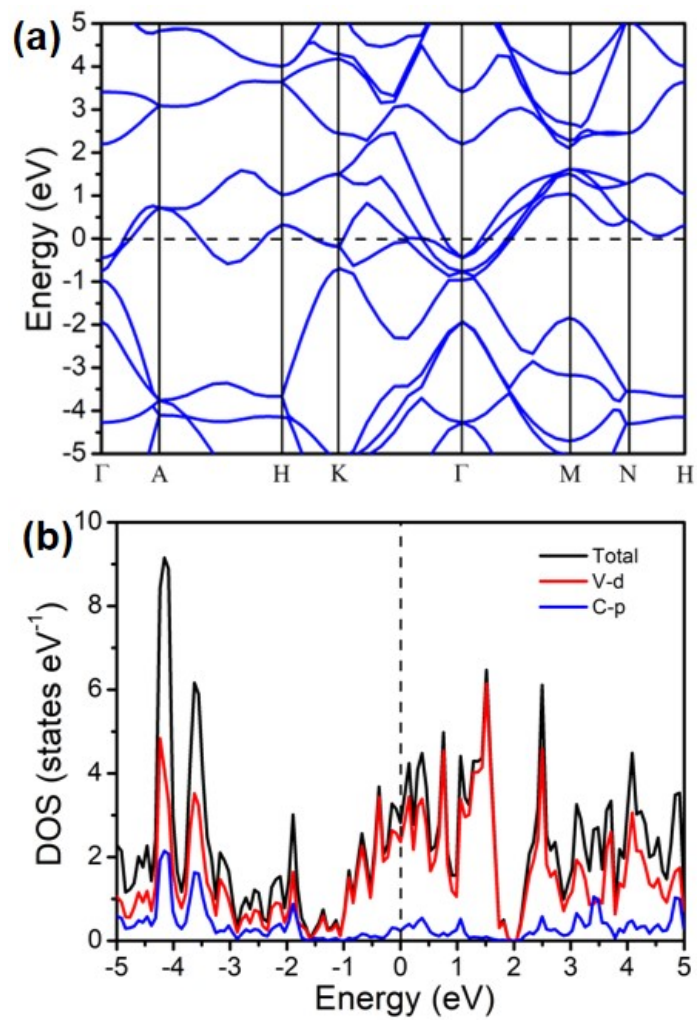

**Fig. S9** Calculated (a) band structure and (b) PDOS of  $V_2C$ .

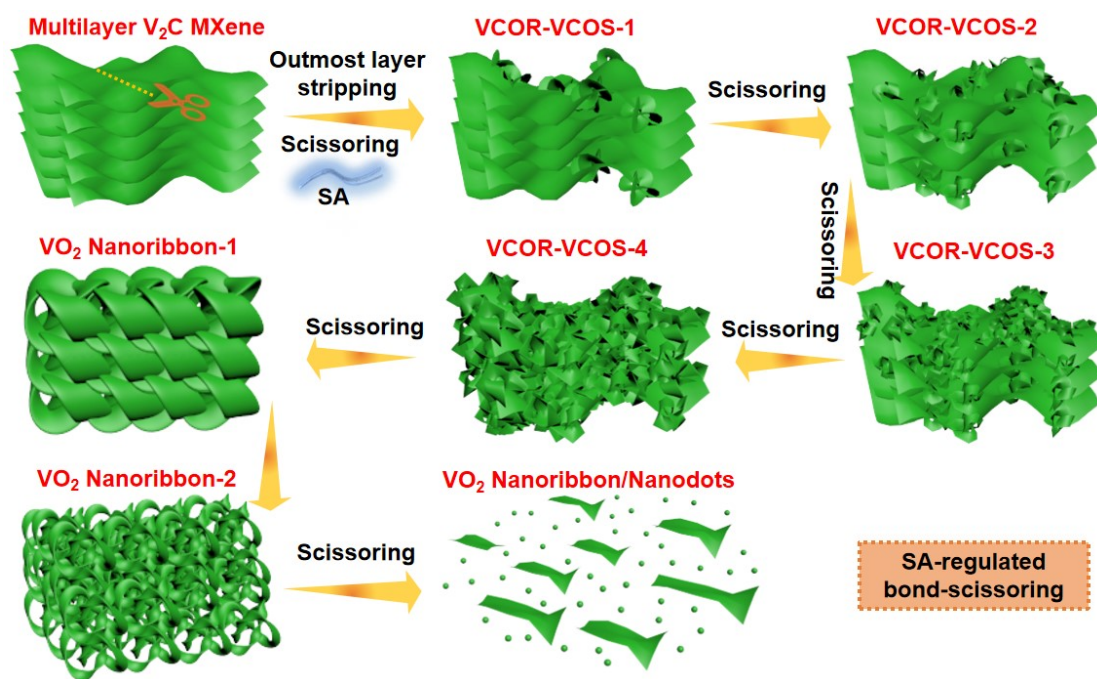

Fig. S10 Scheme for SA-regulated bond-scissoring of the multi-layer  $V_2C$  nanosheets.

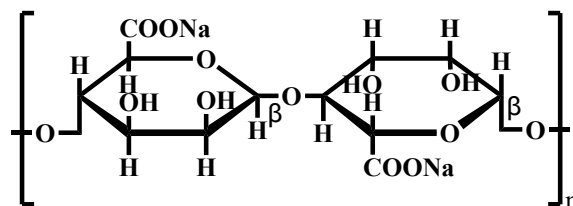

Fig. S11 The molecular structure of SA.

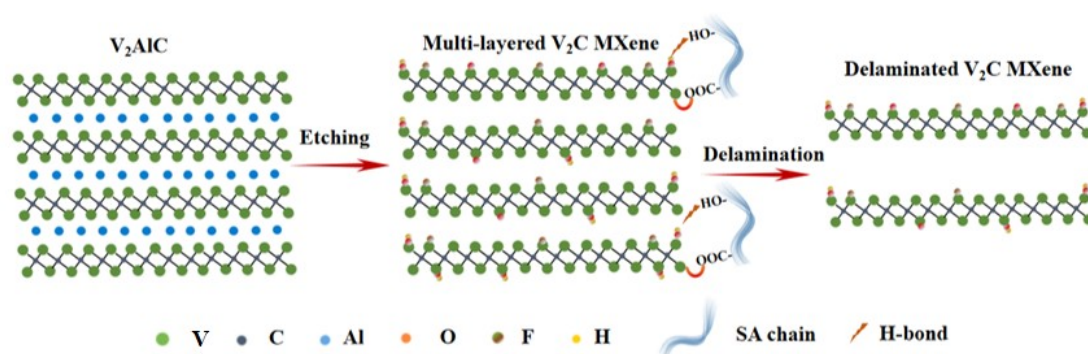

Fig. S12 Scheme for the *in situ* delamination of as-synthesized  $V_2C$  nanosheets in the presence of SA.

As can be seen clearly in Fig. S11 and S12, the strong coordination between carboxyl groups of long SA chains and edge V atoms of the  $V_2C$  surface as well as extensive

hydrogen bonds between  $V_2C$  and SA could weaken the V-C bonds and the van der Waals force between the adjacent  $V_2C$  nanosheets.

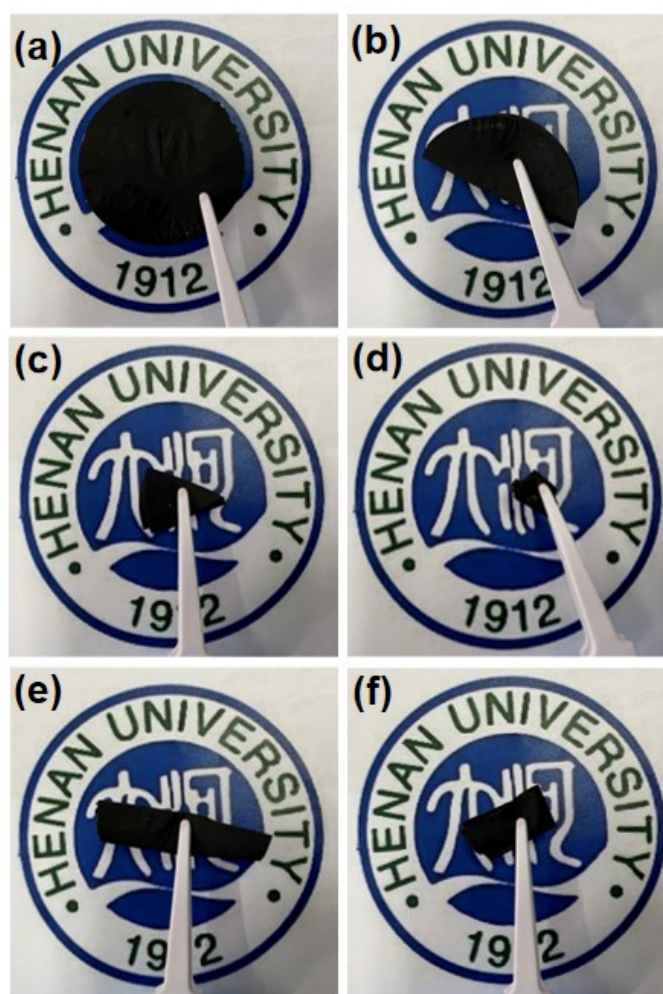

**Fig. S13** Digital photos of the self-supporting and flexible  $V_2C$ -160 at various bending states.

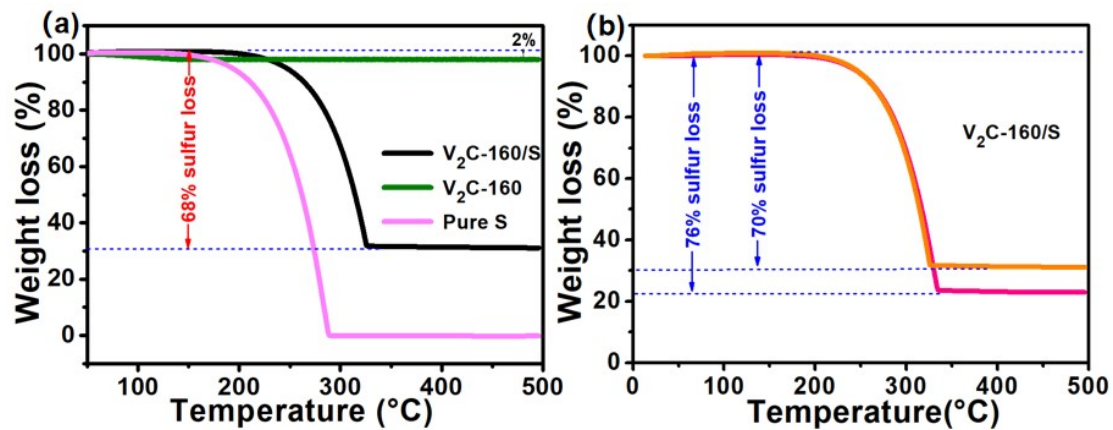

**Fig. S14** TGA plots of  $V_2C-160/S$  composite with different sulfur content for the electrode with areal sulfur loadings of (a) 1.7 and 2.8  $mg\ cm^{-2}$  (black line) and (b) 5.6 and 8.6  $mg\ cm^{-2}$  (orange and pink lines).

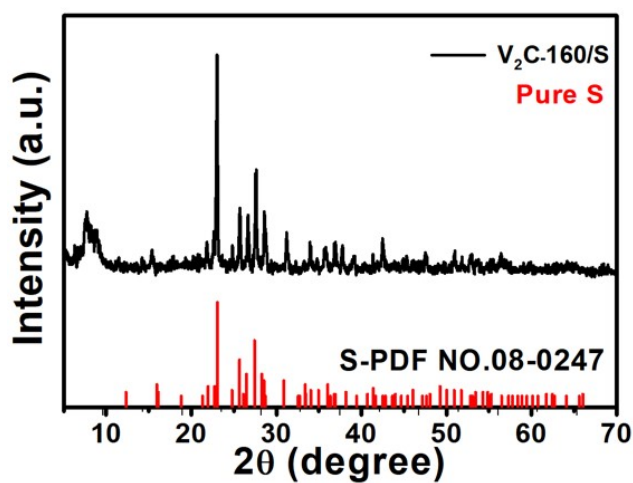

**Fig. S15** XRD patterns for  $V_2C-160/S$  and pure S.

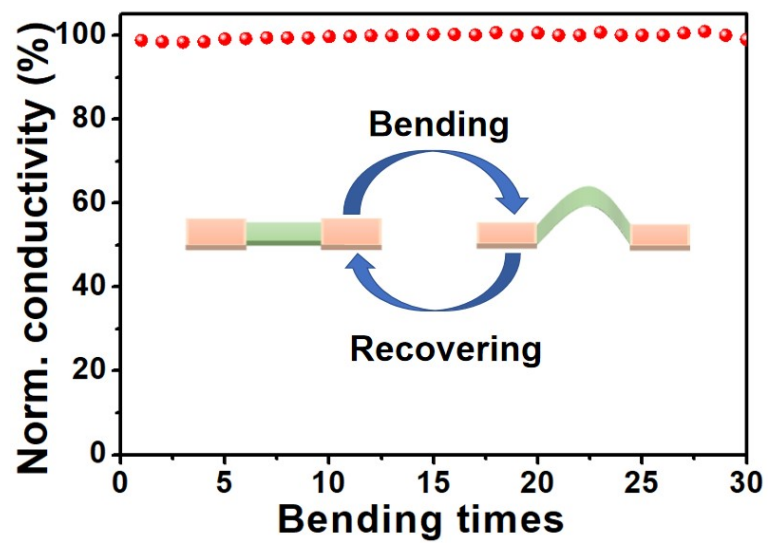

**Fig. S16** The normalized conductivity of flexible V<sub>2</sub>C-160/S paper versus bending times.

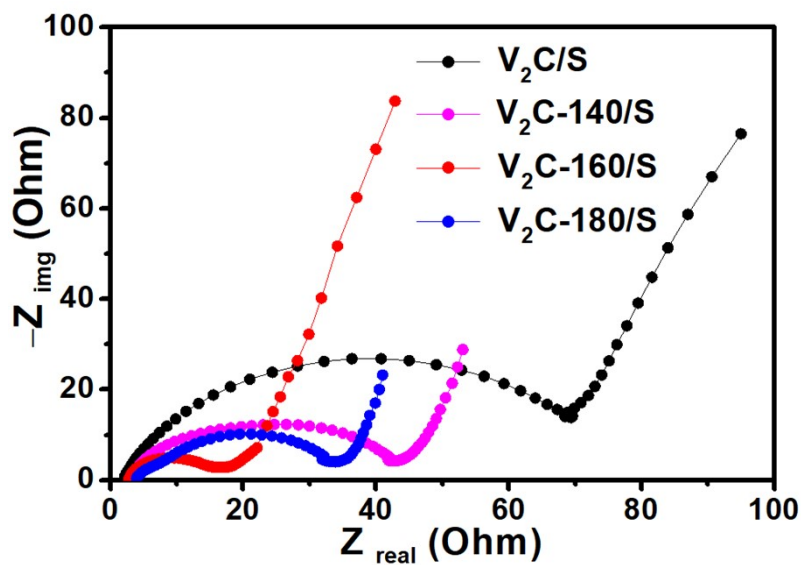

**Fig. S17** Nyquist plots for the V<sub>2</sub>C/S, V<sub>2</sub>C-140/S, V<sub>2</sub>C-160/S and V<sub>2</sub>C-180/S electrodes.

**Table S1.** Summary of various hybrid architectures based on 2D MXenes and low-dimensional inorganic nanostructures in terms of morphology, application, and electrochemical performance.

| Nanohybrids                                                                                      | Morphology    | Application        | Performance                                        | Ref       |
|--------------------------------------------------------------------------------------------------|---------------|--------------------|----------------------------------------------------|-----------|
| TiO <sub>2</sub> @Ti <sub>3</sub> C <sub>2</sub> T <sub>x</sub> <sup>s)</sup>                    | Nanoparticles | SIBs <sup>a)</sup> | ≈90 mA h g <sup>-1</sup> at 0.1 A g <sup>-1</sup>  | [8]       |
| SnO <sub>2</sub> @Ti <sub>3</sub> C <sub>2</sub> T <sub>x</sub> <sup>s)</sup>                    | Nanowires     | LIBs <sup>b)</sup> | 530 mA h g <sup>-1</sup> at 1 A g <sup>-1</sup>    | [9]       |
| Nb <sub>2</sub> O <sub>5</sub> @Nb <sub>4</sub> C <sub>3</sub> T <sub>x</sub> <sup>s)</sup>      | Nanoparticles | LIBs               | 167 mA h g <sup>-1</sup> at 1 C                    | [8]       |
| NiCo <sub>2</sub> O <sub>4</sub> @Ti <sub>3</sub> C <sub>2</sub> T <sub>x</sub> <sup>s)</sup>    | Nanoparticles | LIBs               | ≈410 mA h g <sup>-1</sup> at 5C                    | [10]      |
| NiCo <sub>2</sub> O <sub>4</sub> @Ti <sub>3</sub> C <sub>2</sub> T <sub>x</sub> <sup>s)</sup>    | Nanoflakes    | LIBs               | ≈1200 mA h g <sup>-1</sup> at 1 C                  | [10]      |
| Co <sub>3</sub> O <sub>4</sub> @Ti <sub>3</sub> C <sub>2</sub> T <sub>x</sub> <sup>s)</sup>      | Nanoflakes    | LIBs               | ≈650 mA h g <sup>-1</sup> at 1 C                   | [10]      |
| Na <sub>0.23</sub> TiO <sub>2</sub> @Ti <sub>3</sub> C <sub>2</sub> T <sub>x</sub> <sup>s)</sup> | Nanobelts     | LIBs               | 178 mA h g <sup>-1</sup> at 5 A g <sup>-1</sup>    | [11]      |
| Na <sub>0.23</sub> TiO <sub>2</sub> @Ti <sub>3</sub> C <sub>2</sub> T <sub>x</sub> <sup>s)</sup> | Nanobelts     | SIBs               | 56 mAh g <sup>-1</sup> at 2 A g <sup>-1</sup>      | [11]      |
| Fe <sub>3</sub> O <sub>4</sub> @Ti <sub>3</sub> C <sub>2</sub> T <sub>x</sub> <sup>s)</sup>      | Nanoparticles | LIBs               | 2038 mA h cm <sup>-3</sup> at 1 C                  | [12]      |
| SnS@Ti <sub>3</sub> C <sub>2</sub> T <sub>x</sub> <sup>s)</sup>                                  | Nanoparticles | SIBs               | 256 mA h g <sup>-1</sup> at 1 A g <sup>-1</sup>    | [13]      |
| BP@Ti <sub>3</sub> C <sub>2</sub> T <sub>x</sub> <sup>s)</sup>                                   | Quantum dots  | LIBs               | 520 mA h g <sup>-1</sup> at 1 A g <sup>-1</sup>    | [14]      |
| GRO@S <sup>f)</sup>                                                                              | Nanosheets    | LSB <sup>c)</sup>  | 1107 mA h g <sup>-1</sup> at 0.2 C                 | [15]      |
| 1T-2H MoS <sub>2</sub> -C@Ti <sub>3</sub> C <sub>2</sub> T <sub>x</sub> <sup>s)</sup>            | Nanosheets    | LSB                | 677.2 mA h g <sup>-1</sup> at 2 C                  | [16]      |
| Meso-C@Ti <sub>3</sub> C <sub>2</sub> T <sub>x</sub> <sup>s)</sup>                               | Nanosheets    | LSB                | 727.8mA h g <sup>-1</sup> at 2 C                   | [17]      |
| PEI-CNT@Ti <sub>3</sub> C <sub>2</sub> T <sub>x</sub> <sup>s)</sup>                              | Nanosheets    | LSB                | ≈950 mA h g <sup>-1</sup> at 2.5 C                 | [18]      |
| CNT@Nb <sub>2</sub> CT <sub>x</sub> <sup>f)</sup>                                                | Paper         | LIBs               | ≈370 mA h g <sup>-1</sup> at 2.5 C                 | [19]      |
| VO <sub>2</sub> (p)@V <sub>2</sub> CT <sub>x</sub> <sup>s)</sup>                                 | Nanorods      | LSB                | 756 mA h g <sup>-1</sup> at 2C                     | [20]      |
| V <sub>2</sub> O <sub>5</sub> @V <sub>2</sub> CT <sub>x</sub> <sup>s)</sup>                      | Nanotube      | LSB                | 1086mA h g <sup>-1</sup> at 0.2 C                  | [21]      |
| TS-Ti <sub>3</sub> C <sub>2</sub> /CNT <sup>s)</sup>                                             | Microsphere   | LSB                | 1225mA h g <sup>-1</sup> at 0.2 C                  | [22]      |
| Ti <sub>3</sub> C <sub>2</sub> T <sub>x</sub> paper <sup>f)</sup>                                | Nanosheets    | LSB                | 1270mA h g <sup>-1</sup> at 0.5 C                  | [23]      |
| PSU-Celgard separators <sup>f)</sup>                                                             | Nanosheets    | LSB                | 1112.8mA h g <sup>-1</sup> at 0.5 C                | [24]      |
| rGO/CNT <sup>f)</sup>                                                                            | Paper         | LSB                | 1051mA h g <sup>-1</sup> at 0.5 C                  | [25]      |
| Co@NCNP/NCNT <sup>f)</sup>                                                                       | Microsphere   | LSB                | 703mA h g <sup>-1</sup> at 0.15 C                  | [26]      |
| CNT/PPy@CS <sup>f)</sup>                                                                         | Paper         | LSB                | 1124 mA h g <sup>-1</sup> at 0.1 A g <sup>-1</sup> | [27]      |
| g-C <sub>3</sub> N <sub>4</sub> @CC <sup>f)</sup>                                                | Carbon fibers | LSB                | 937.4mA h g <sup>-1</sup> at 0.5 C                 | [28]      |
| NCF/CNT/PEDOT@S <sup>f)</sup>                                                                    | Nanoarrays    | LSB                | 1167mA h g <sup>-1</sup> at 0.2 C                  | [29]      |
| MoS <sub>2</sub> @CMT <sup>f)</sup>                                                              | Microtubes    | LSB                | 1162mA h g <sup>-1</sup> at 0.5 C                  | [30]      |
| PS/W <sub>2</sub> C-CNFs <sup>f)</sup>                                                           | Nanoparticles | LSB                | 1200mA h g <sup>-1</sup> at 0.2 C                  | [31]      |
| TiO <sub>2</sub> /C <sup>f)</sup>                                                                | Nanoparticles | LSB                | 1102mA h g <sup>-1</sup> at 0.5 C                  | [32]      |
| PCNFs-2 <sup>f)</sup>                                                                            | Nanofibers    | LSB                | 1028mA h g <sup>-1</sup> at 0.2 C                  | [33]      |
| V <sub>2</sub> CT <sub>x</sub> /VO <sub>2</sub> <sup>f)</sup>                                    | Nanoribbon    | LSB                | 1254mA h g <sup>-1</sup> at 0.2 C                  | This Work |

a) Sodium-ion batteries; b) Lithium-ion batteries; c) Li-S batteries. s) slurry-coating cathode; f) flexible cathode.

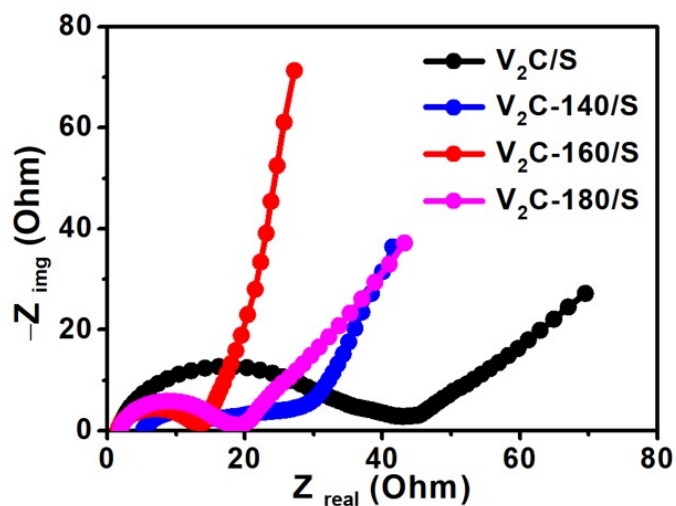

**Fig. S18** Nyquist plots for the  $V_2C/S$ ,  $V_2C-140/S$ ,  $V_2C-160/S$  and  $V_2C-180/S$  electrodes after 100 cycles at 0.5 C.

As shown in Fig. S17† and S18†, a much depressed quasi-semicircle in the high-frequency region and a more inclined line in the low-frequency region are observed in the  $V_2C-160/S$  electrode, indicative of rapid electron/ion-transfer kinetics.

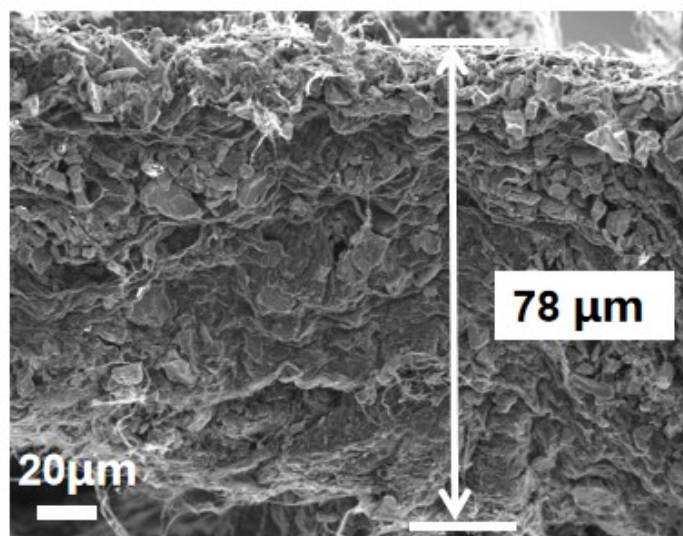

**Fig. S19** Cross-section SEM image of the self-supporting  $V_2C-160/S$  cathode with areal sulfur loading of  $8.6 \text{ mg cm}^{-2}$ . The average thickness of 78  $\mu\text{m}$  was obtained after testing five cathode pieces.



**Table S2.** Comparison of sulfur loading, mass capacity based on sulfur mass alone, gravimetric/areal/volumetric capacities. The data are collected from recent reports with areal sulfur loading between 5-15 mg cm<sup>-2</sup>.

| Cathode materials                                                           | Sulfur loading [mg cm <sup>-2</sup> ] | Gravimetric capacity [mAh g <sup>-1</sup> ] | Areal capacity [mAh cm <sup>-2</sup> ] | Volumetric capacity [mAh cm <sup>-3</sup> ] | Ref. |
|-----------------------------------------------------------------------------|---------------------------------------|---------------------------------------------|----------------------------------------|---------------------------------------------|------|
| Layer-by-layer sulfur cathode <sup>b)</sup>                                 | 11.4                                  | 560                                         | 6.4                                    | 113, 0.2 C                                  | [34] |
| Pie-like sulfur cathode <sup>b)</sup>                                       | 10.8                                  | 536                                         | 5.8                                    | 397, 0.2 C                                  | [35] |
| Li <sub>2</sub> S <sub>6</sub> loaded in CNF@MnO <sub>2</sub> <sup>b)</sup> | 7.2                                   | 575                                         | 4.1                                    | 262, 0.2 C                                  | [36] |
| MWCNT@S <sup>b)</sup>                                                       | 9.28                                  | 840                                         | 7.8                                    | 577, 0.2 C                                  | [37] |
| G@HMCN/S-G <sup>b)</sup>                                                    | 10.0                                  | 918                                         | 9.2                                    | 1350, 0.1 C                                 | [38] |
| CoP@G/CC-S <sup>b)</sup>                                                    | 10.83                                 | 813                                         | 8.81                                   | Not given, 0.05 C                           | [39] |
| 3DP-LaB <sub>6</sub> /SP@S <sup>b)</sup>                                    | 9.3                                   | 833                                         | 7.75                                   | 262.7, 0.05 C                               | [40] |
| GC-TiO@CHF/S <sup>a)</sup>                                                  | 5                                     | 700                                         | 3.5                                    | 630, 0.2 C                                  | [41] |
| FLPT-S <sup>a)</sup>                                                        | 10.5                                  | 564                                         | 5.93                                   | 1185, 0.033 C                               | [42] |
| TC-100/S <sup>a)</sup>                                                      | 9.2                                   | 698                                         | 6.42                                   | 1235, 0.05 C                                | [43] |
| IBGM-S <sup>b)</sup>                                                        | 5.6                                   | 928                                         | 5.2                                    | 653                                         | [44] |
| SACNT@SNC@S <sup>b)</sup>                                                   | 7                                     | 896.5                                       | 6.3                                    | Not given, 0.5 C                            | [45] |

|                           |       |      |      |                  |                  |
|---------------------------|-------|------|------|------------------|------------------|
| S@HKUST <sup>a)</sup>     | 11.33 | 658  | 7.45 | 820, 0.1 C       | [46]             |
| RGO@S films <sup>b)</sup> | 5.8   | 1238 | 7.2  | Not given, 0.1 C | [47]             |
| VCOR-VCOS/S <sup>b)</sup> | 8.6   | 954  | 8.2  | 1192, 0.2 C      | <b>This work</b> |

a) non-flexible cathode, b) flexible cathode.

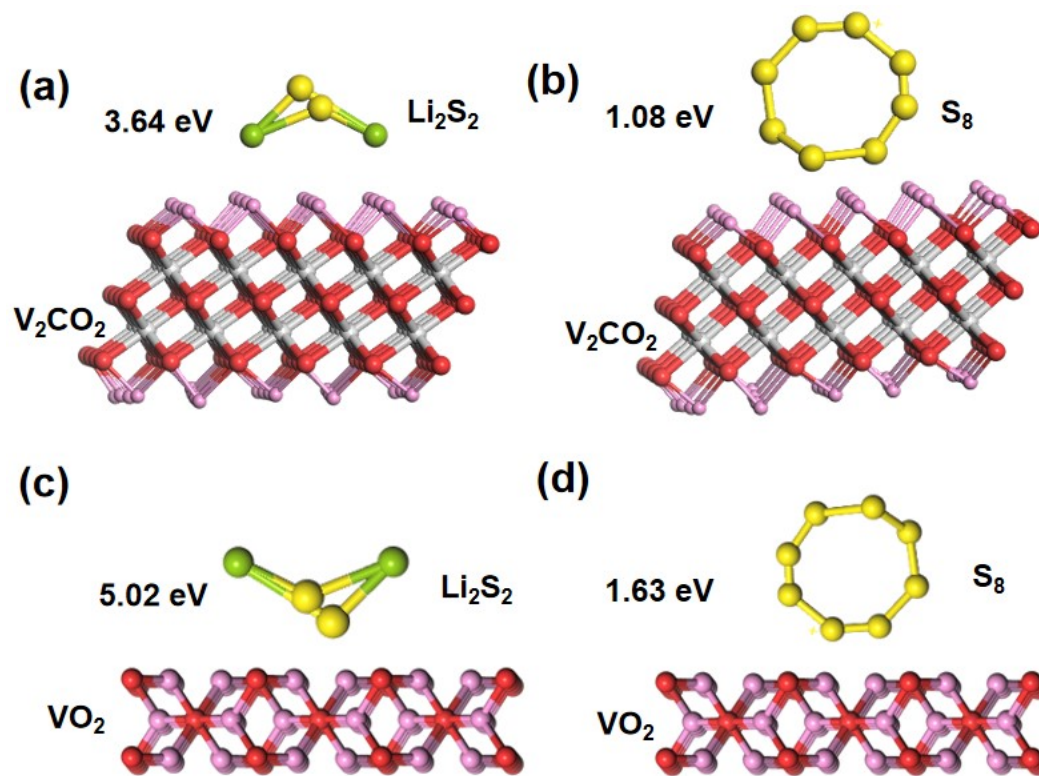

**Fig. S20** Binding energy values and corresponding optimized geometry of  $\text{Li}_2\text{S}_2$  and  $\text{S}_8$  adsorbed on the surfaces of  $\text{V}_2\text{CO}_2$  (a-b) and  $\text{VO}_2$  (c-d).

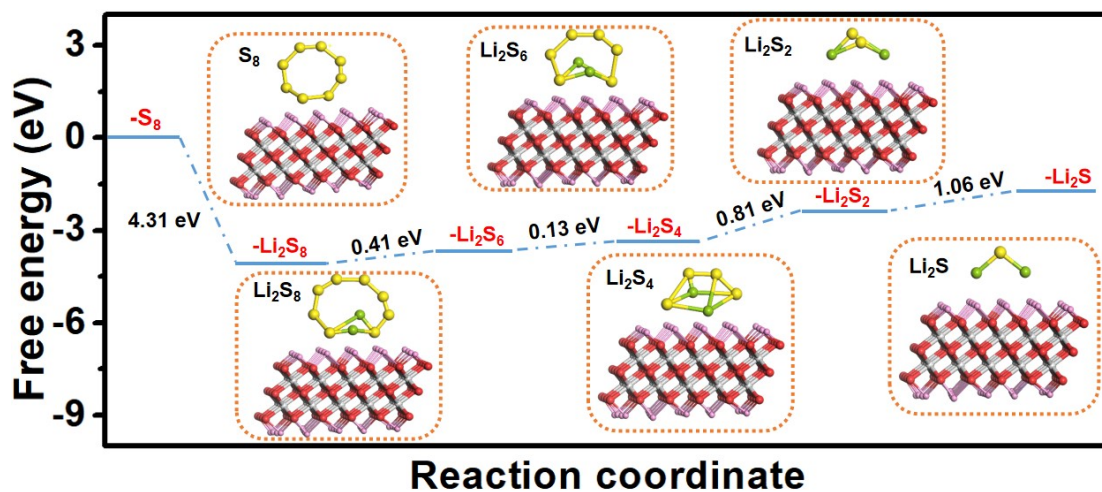

Fig. S21 Energy profiles for the reduction of LiPS on  $V_2CO_2$ , The insets in (Figure S20) are the optimized adsorption conformations of sulfur-related species on  $V_2CO_2$ .

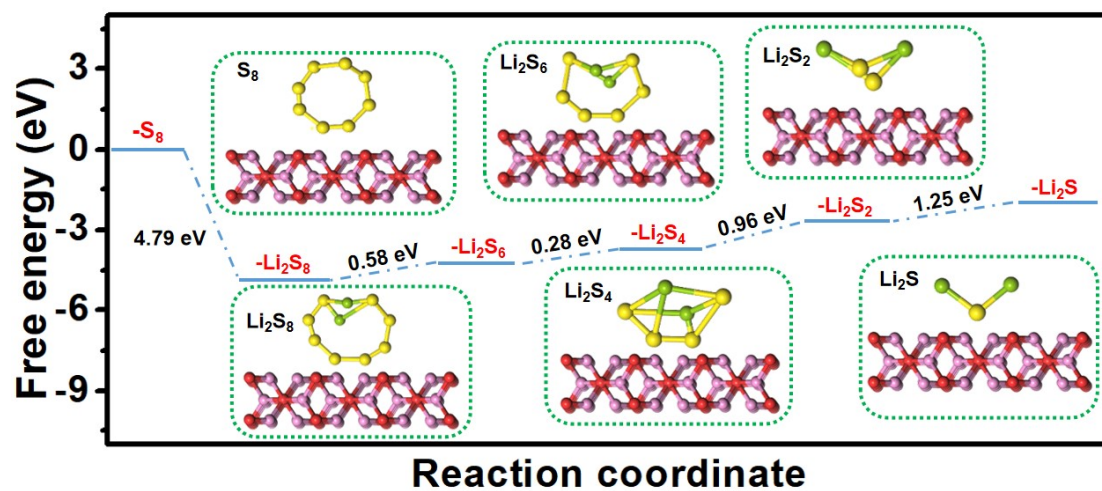

Fig. S22 Energy profiles for the reduction of LiPS on  $VO_2$ . The insets in (Figure S21) are the optimized adsorption conformations of sulfur-related species on  $VO_2$ .

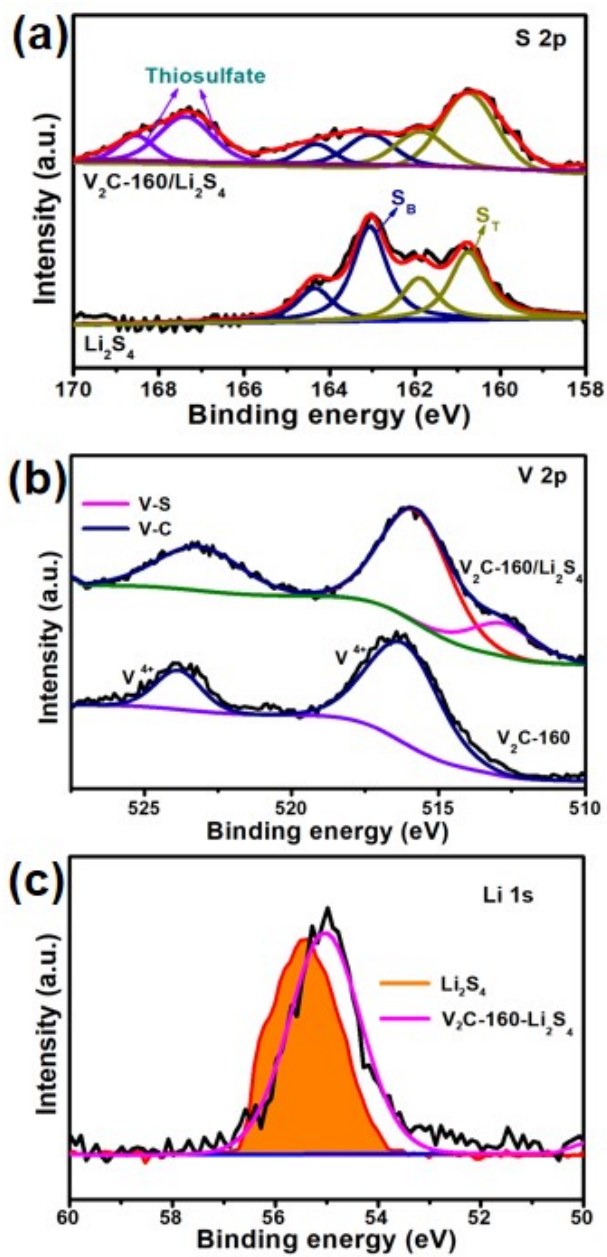

**Fig. S23** (a) S 2p XPS spectra of  $\text{Li}_2\text{S}_4$  and  $\text{V}_2\text{C-160/Li}_2\text{S}_4$  composite, (b) V 2p XPS spectra of  $\text{V}_2\text{C-160}$  and  $\text{V}_2\text{C-160/Li}_2\text{S}_4$  composite, and (c) Li 1s XPS spectra of  $\text{Li}_2\text{S}_4$  and  $\text{V}_2\text{C-160/Li}_2\text{S}_4$  composite.

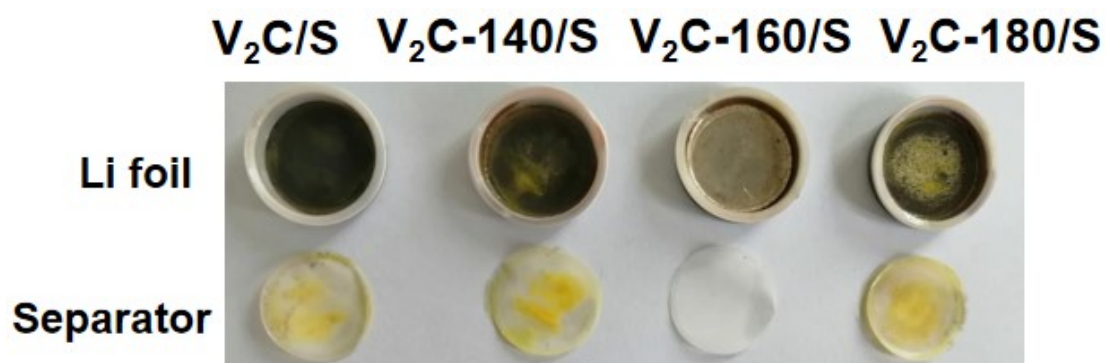

**Fig. S24** Photographs of the anodes, separators and cathode pieces of the V<sub>2</sub>C/S, V<sub>2</sub>C-140/S, V<sub>2</sub>C-160/S and V<sub>2</sub>C-180/S cells (from left to right) after 500 cycles at 0.5 C.

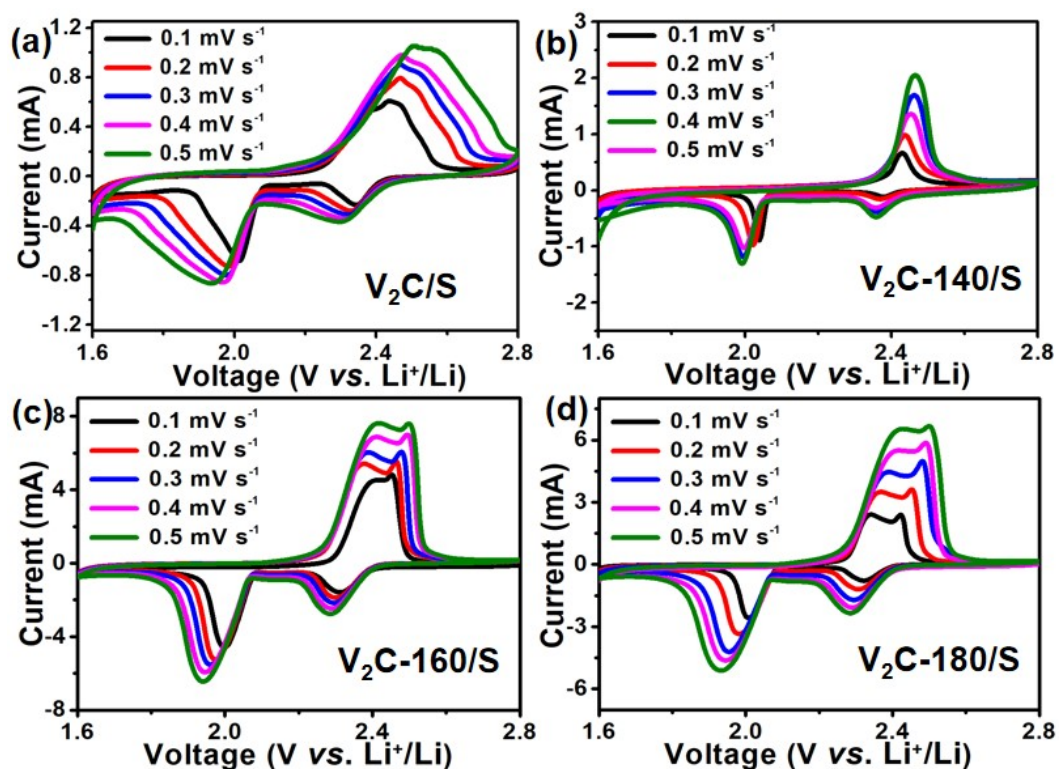

**Fig. S25** CV curves of (a) V<sub>2</sub>C/S, (b) V<sub>2</sub>C-140/S, (c) V<sub>2</sub>C-160/S and (d) V<sub>2</sub>C-180/S electrodes at different scan rates from 0.1 to 0.5 mV s<sup>-1</sup>.

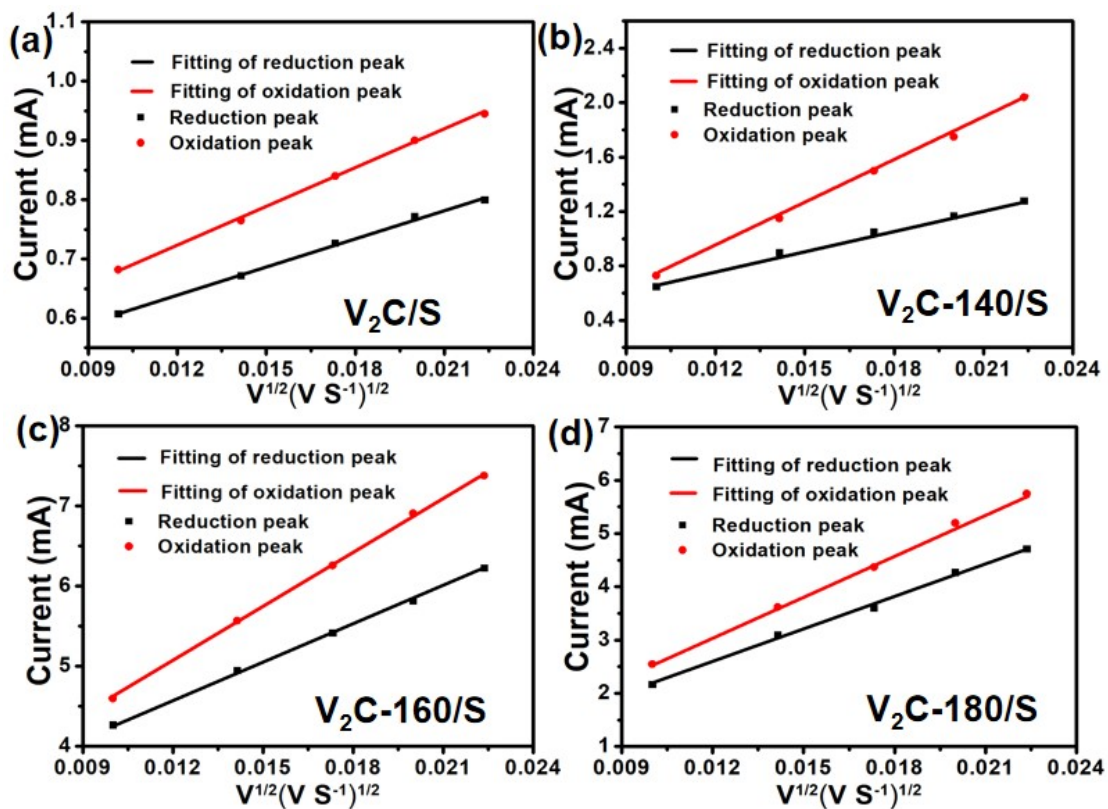

**Fig. S26** The plots of CV peak currents vs. square root of scan rates for (a)  $V_2C/S$ , (b)  $V_2C-140/S$ , (c)  $V_2C-160/S$  and (d)  $V_2C-180/S$  electrodes.

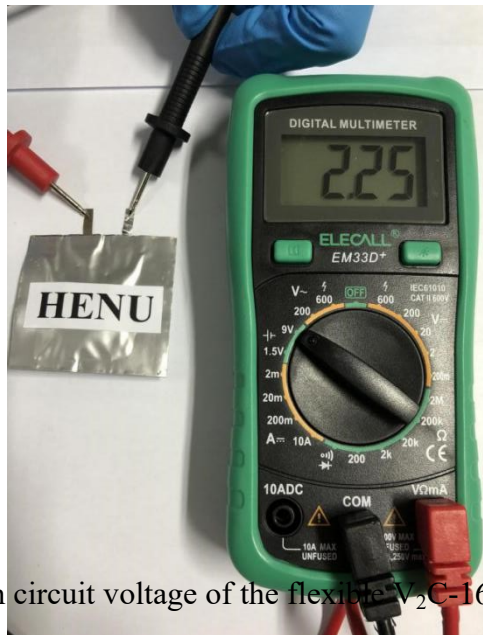

**Fig. S27** Open circuit voltage of the flexible  $\text{V}_2\text{C}-160/\text{S}$  pouch cell.

## References

- [S1] G. Kresse and J. Furthmuller, *Phys. Rev. B.*, 1996, **54**, 11169.
- [S2] J. P. Perdew, J. A. Chevary, S. H. Vosko, K. A. Jackson, M. R. Pederson, D. J. Singh and C. Fiolhais, *Phys. Rev. B.*, 1992, **46**, 6671.
- [S3] V. I. Anisimov, J. Zaanen and O. K. Andersen, *Phys. Rev. B.*, 1991, **44**, 943.
- [S4] J. Klimeš, D. R. Bowler and A. J. Michaelides, *Phys. Rev. B.*, 2011, **83**, 195131.
- [S5] K. Lee, É. D. Murray, L. Kong, B. I. Lundqvist and D. C. Langreth, *Phys. Rev. B.*, 2010, **82**, 081101.
- [S6] B. Silvi and A. Savin, *Nature*, 1994, **371**, 683-686.
- [S7] A. Savin, R. Nesper, S. Wengert and T. E. Fässler, *Angew. Chem. Int. Ed.*, 1997, **36**, 1808-1832.
- [S8] C. Zhang, S. J. Kim, M. Ghidui, M. Q. Zhao, M. W. Barsoum, V. Nicolosi and Y. Gogotsi, *Adv. Funct. Mater.*, 2016, **26**, 4143-4151.
- [S9] Y. T. Liu, P. Zhang, N. Sun, B. Anasori, Q. Z. Zhu, H. Liu, Y. Gogotsi and B. Xu, *Adv. Mater.*, 2018, **30**, 1707334.
- [S10] M. Zhao, M. Torelli, C. E. Ren, M. Ghidui, Z. Ling, B. Anasori, M. W. Barsoum and Y. Gogotsi, *Nano Energy*, 2016, **30**, 603-613.
- [S11] J. M. Huang, R. J. Meng, L. H. Zu, Z. J. Wang, N. Feng, Z. Y. Yang, Y. Yu and J. H. Yang, *Nano Energy*, 2018, **46**, 20-28.
- [S12] Y. Wang, Y. Li, Z. Qiu, X. Wu, P. Zhou, T. Zhou, J. Zhao, Z. Miao, J. Zhou and S. Zhuo, *J. Mater. Chem. A.*, 2018, **6**, 11189-11197.
- [S13] Y. Zhang, B. Guo, L. Hu, Q. Xu, Y. Li, D. Liu and M. Xu, *J. Alloys Compd.*,



2018, **732**, 448-453.

[S14] R. J. Meng, J. M. Huang, Y. T. Feng, L. H. Zu, C. X. Peng, L. R. Zheng, L. Zheng, Z. B. Chen, G. L. Liu, B. J. Chen, Y. L. Mi and J. H. Yang, *Adv. Energy Mater.*, 2018, **8**, 1801514.

[S15] Z. B. Xiao, Z. L. Li, P. Y. Li, X. P. Meng and R. H. Wang, *Nano Energy*, 2020, **70**, 104522.

[S16] Y. L. Zhang, Z. J. Mu, C. Yang, Z. K. Xu, S. Zhang, X. Y. Zhang, Y. J. Li, J. P. Lai, Z. H. Sun, Y. Yang, Y. G. Chao, C. J. Li, X. X. Ge, W. X. Yang and S. J. Guo, *Adv. Funct. Mater.*, 2018, **28**, 1707578.

[S17] W. Z. Bao, D. W. Su, W. X. Zhang, X. Guo and G. X. Wang, *Adv. Funct. Mater.*, 2016, **6**, 8746.

[S18] D. Guo, F. W. Ming, H. Su, Y. Q. Wu, W. Wahyudi, M. L. Li, M. N. Hedhili, G. Sheng, L. J. Li, H. Alshareef, Y. X. Li and Z. P. Lai, *Nano Energy*, 2019, **61**, 478-485.

[S19] O. Mashtalir, M. R. Lukatskaya, M. Q. Zhao, M. W. Barsoum and Y. Gogotsi, *Adv. Mater.*, 2015, **27**, 3501.

[S20] Z. G. Wang, K. Yu, Y. Feng, R. J. Qi, J. Ren and Z. Q. Zhu, *ACS Appl. Mater. Interfaces.*, 2019, **11**, 44282-44292.

[S21] Z. G. Wang, K. Yu, S. J. Gong, E. Du and Z. Q. Zhu, *Nanoscale*, 2020, **12**, 18950-18964.

[S22] X. Wang, D. Luo, J. Y. Wang, Z. H. Sun, G. L. Cui, Y. X. Chen, T. Wang, L. R. Zheng, Y. Zhao, L. L. Shui, G. F. Zhou, K. Kempa, Y. G. Zhang and Z. W. Chen, *Angew. Chem. Int. Ed.*, 2020, **59**, 2-10.

- [S23] H. Tang, W. L. Li, L. M. Pan, K. J. Tu, F. Du, T. Qiu, J. Yang, C. P. Cullen, N. McEvoy and C. F. Zhang, *Adv. Funct. Mater.*, 2019, **29**, 1901907.
- [S24] B. Z. Yu, Y. Fan, S. Mateti, D. G. Kim, C. Zhao, S. G. Lu, X. Liu, Q. Z. Rong, T. Tao, K. K. Tanwar, X. Tan, S. C. Smith and Y. I. Chen, *ACS Nano*, 2021, **15**, 1358-1369.
- [S25] X. Fang, W. Weng, J. Ren and H. S. Peng, *Adv. Mater.*, 2016, **28**, 491-496.
- [S26] W. Yan, J. Wei, T. Chen, L. Duan, L. Wang, X. L. Xue, R. P. Chen, W. H. Kong, H. N. Lin, C. H. Li and Z. Jin, *Nano Energy*, 2021, **80**, 105510.
- [S27] X. W. Fu, F. Dunne, M. Chen and W. H. Zhong, *Nanoscale*, 2020, **12**, 5483-5493.
- [S28] H. H. Li, H. Q. Chen, Y. Xue, Y. T. Zhang, M. J. Zhang, W. Q. Yu, G. Y. Bai, K. L. Zhuo and Y. P. Zheng, *Adv. Energy Mater.*, 2020, **10**, 2001683.
- [S29] M. Zhang, K. Amin, M. Cheng, H. X. Yuan, L. J. Mao, W. Yan and Z. X. Wei, *Nanoscale*, 2018, **10**, 21790.
- [S30] J. Y. Yang, L. H. Yu, B. B. Zheng, N. R. Li, J. Y. Xi and X. P. Qiu, *Adv. Sci.*, 2020, **7**, 1903260.
- [S31] M. J. Yao, R. Wang, Z. F. Zhao, Y. Liu, Z. Q. Niu and J. Chen, *ACS Nano*, 2018, **12**, 12503-12511.
- [S32] F. Zhou, Z. Li, X. Luo, T. Wu, B. Jiang, L. L. Lu, H. B. Yao, M. Antonietti, and S. H. Yu, *Nano Lett.*, 2018, **18**, 1035-1043.
- [S33] F. Y. Hu, H. Peng, T. P. Zhang, W. L. Shao, S. Y. Liu, J. Y. Wang, C. H. Wang and X. G. Jian, *J. Energy Chem.*, 2021, **58**, 115-123.

- [S34] L. Qie and A. Manthiram, *Adv. Mater.*, 2015, **27**, 1694-1700.
- [S35] Z. Li, J. Zhang, Y. Chen, J. Li and X. W. Lou, *Nat. Commun.*, 2015, **6**, 8850.
- [S36] H. Xu, L. Qie and A. Manthiram, *Nano Energy*, 2016, **26**, 224-232.
- [S37] H. Kim, Y. H. Lee, S. J. Cho, J. G. Gwon, H. J. Cho, M. Jang, S. Y. Lee and S. Y. Lee, *Energy Environ. Sci.*, 2019, **12**, 177-186.
- [S38] F. Pei, L. L. Lin, D. H. Ou, Z. M. Zheng, S. G. Mo, X. L. Fang and N. F. Zheng, *Nat. Commun.*, 2017, **8**, 482.
- [S39] J. Jin, W. L. Cai, J. S. Cai, Y. L. Shao, Y. Z. Song, Z. Xia Q. Zhang and J. Y. Sun, *J. Mater. Chem. A.*, 2020, **8**, 3027-3034.
- [S40] J. S. Cai, Z. D. Fan, J. Jin, Z. X. Shi, S. X. Dou, J. Y. Sun and Z. F. Liu, *Nano Energy*, 2020, **75**, 104970.
- [S41] Z. Li, B. Y. Guan, J. Zhang and X. W. Lou, *Joule*, 2017, **1**, 576-587.
- [S42] Z. B. Xiao, Z. L. Li, P. Y. Li, X. P. Meng and R. H. Wang, *ACS Nano*, 2019, **13**, 3404-3412.
- [S43] Z. B. Xiao, Z. L. Li, P. Y. Li, X. P. Meng and R. H. Wang, *ACS Nano*, 2019, **13**, 3608-3617.
- [S44] H. Li, Y. Tao, C. Zhang, D. H. Liu, J. Y. Luo, W. C. Fan, Y. Xu, Y. Z. Li, C. H. You, Z. Z. Pan, M. C. Ye, Z. Y. Chen, Z. Dong, D. W. Wang, F. Y. Kang, J. Lu and Q. H. Yang, *Adv. Energy Mater.*, 2018, **8**, 1703438.
- [S45] L. J. Jia, J. Wang, Z. J. Chen, Y. P. Su, W. Zhao, D. T. Wang, Y. Wei, K. L. Jiang, J. P. Wang, Y. Wu, J. Li, W. H. Duan, S. S. Fan and Y. G. Zhang, *Nano Res.*, 2019, **12**, 1105-1113.

[S46] Q. Pang, X. Liang, C. Y. Kwok, J. Kulisch and L. F. Nazar, *Adv. Energy Mater.*,

2017, **7**, 1601630.

[S47] Y. Liu, M. J. Yao, L. L. Zhang and Z. Q. Niu, *J. Energy Chem.*, 2019, **38**, 199.
